# Supplementary material
Source: publisher figshare collection journal article supplement (https://acs.figshare.com/ndownloader/files/13606793)
Supplement: Supplementary file 1 [file 13606793]

# SUPPLEMENTARY INFORMATION

## Electrophoretically deposited $\text{ZnFe}_2\text{O}_4$ -carbon black porous film as a superior negative electrode for lithium-ion battery

*Debasish Das<sup>a\*</sup>, Arijit Mitra<sup>b</sup>, Sambadan Jena<sup>c</sup>, Subhasish B. Majumder<sup>a</sup>, Rajendra N. Basu<sup>d</sup>*

<sup>a</sup>Advanced Materials Processing Laboratory, Materials Science Centre, Indian Institute of  
Technology, Kharagpur, 721302, India

<sup>b</sup>Structural Characterization of Materials Laboratory, Department of Metallurgical and Materials  
Engineering, Indian Institute of Technology, Kharagpur, 721302, India

<sup>c</sup>School of Nano Science and Technology, Indian Institute of Technology, Kharagpur, 721302,  
India

<sup>d</sup>Fuel Cell and Battery Division, CSIR-Central Glass and Ceramic Research Institute, Kolkata,  
700032, India

### Corresponding Author

\* [debasish.das@matssc.iitkgp.ac.in](mailto:debasish.das@matssc.iitkgp.ac.in), [debasishhegcri@gmail.com](mailto:debasishhegcri@gmail.com)

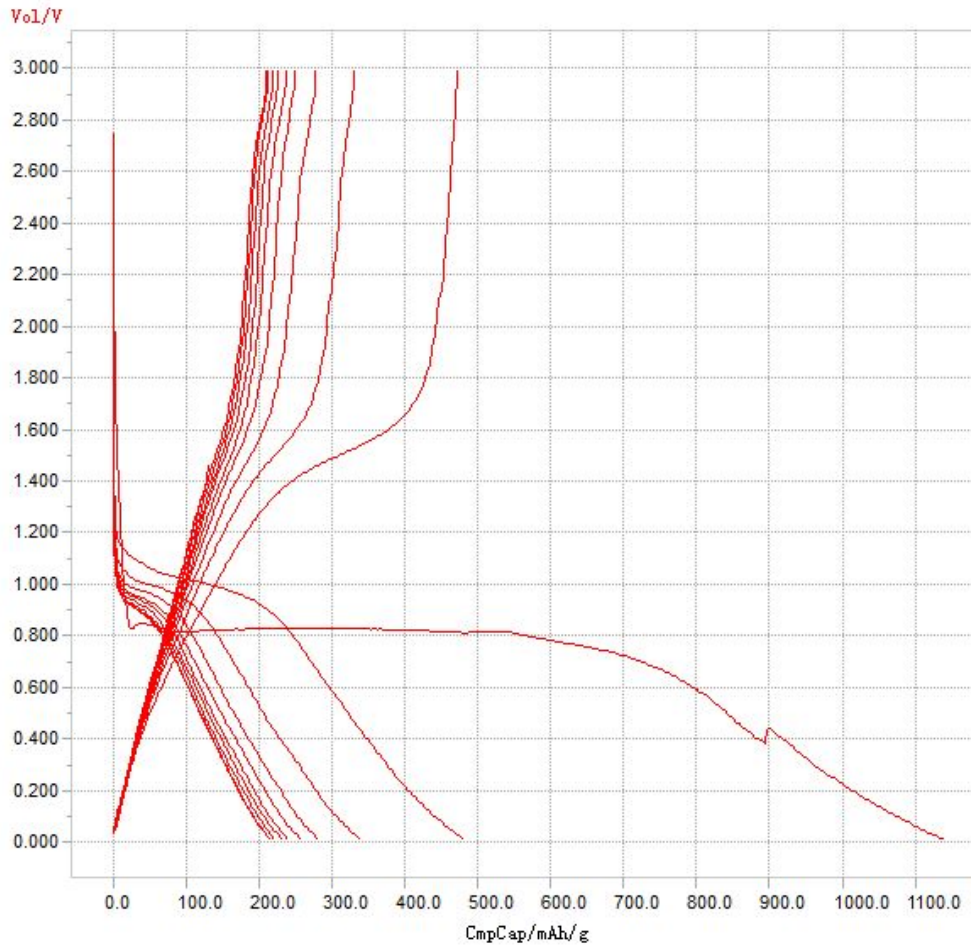

Figure S1: Charge-Discharge profile for ZFO-CB composite film, prepared using tape cast method. The electrodes are cycled at  $100\text{mA g}^{-1}$  specific current between 0.01 and 3.0V. The electrodes show poor electrochemical performance as compared to the ones exhibited by electrophoretically deposited electrodes.
